# Supplementary material for: Effect of analytical treatment interruption and reinitiation of antiretroviral therapy on HIV reservoirs and immunologic parameters in infected individuals
Source: PubMed Central journal article supplement (PMC5764487; doi:10.1371/journal.ppat.1006792), 2018-01-11

Loop D  
(HXB2 *env* 275-283)

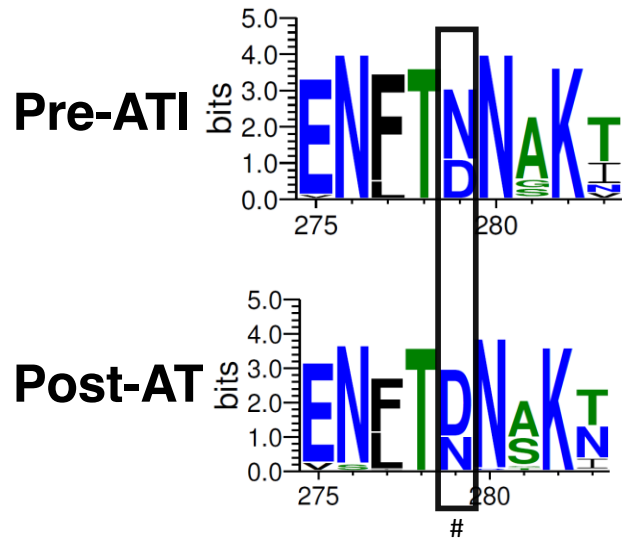

CD4 binding loop  
(HXB2 *env* 362-374)

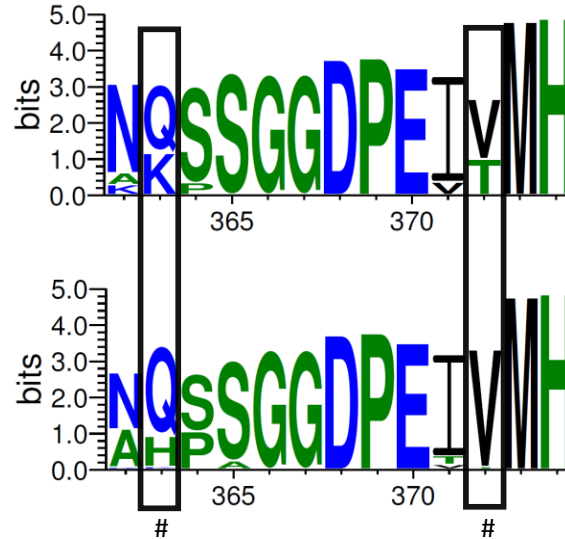

$\beta$ 23 loop V5  
(HXB2 *env* 455-467)

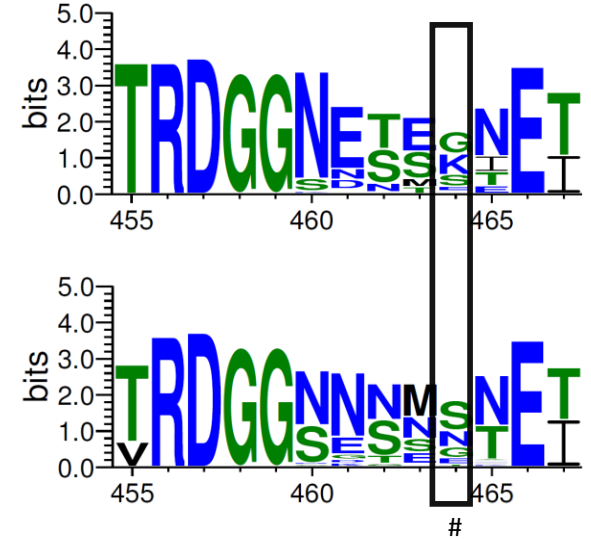

Supplement: ppat.1006792.s001.pdf [file ppat.1006792.s001.pdf]
