# Supplementary material for: Effect of analytical treatment interruption and reinitiation of antiretroviral therapy on HIV reservoirs and immunologic parameters in infected individuals
Source: PubMed Central journal article supplement (PMC5764487; doi:10.1371/journal.ppat.1006792), 2018-01-11
Supplement: ppat.1006792.s004.pdf [file ppat.1006792.s004.pdf]

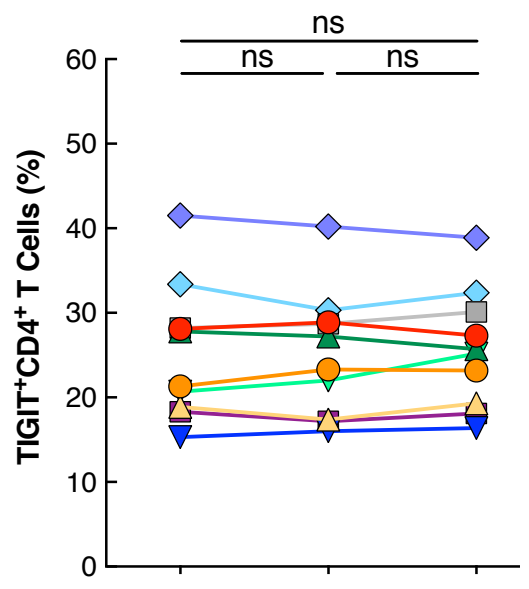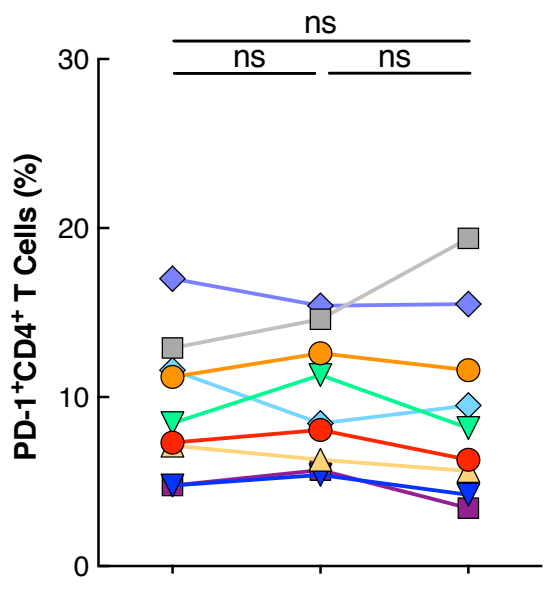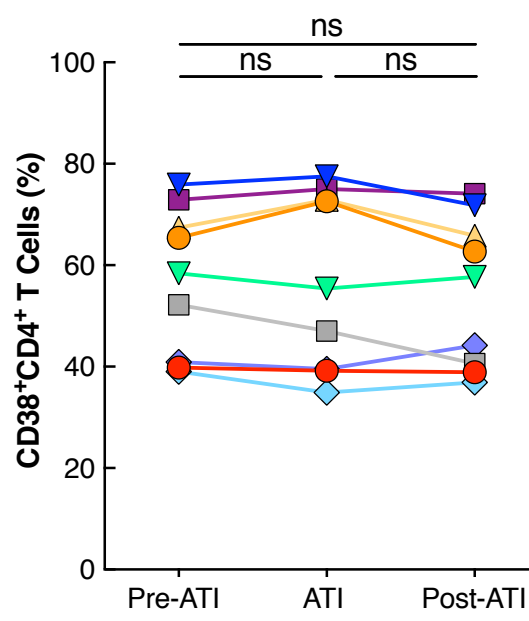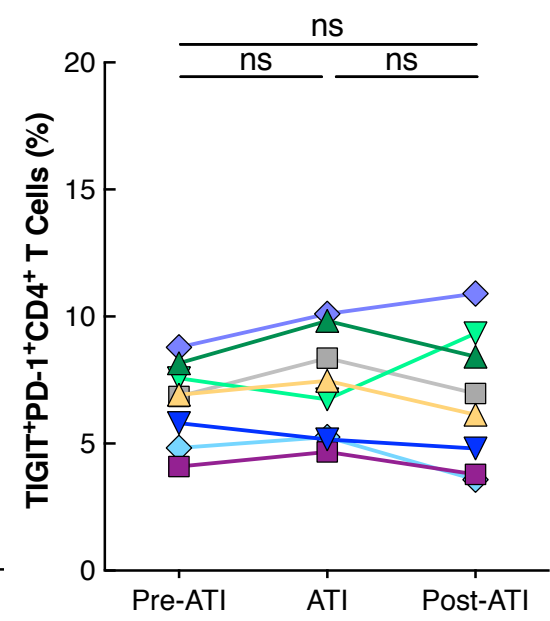

- Subject**
- N01
  - N02
  - ▲ N03
  - ▲ N04
  - ▼ N05
  - ▼ N06
  - N07
  - N08
  - ◆ N09
  - ◆ N10

**Time Points**
