# Supplementary material for: Effect of analytical treatment interruption and reinitiation of antiretroviral therapy on HIV reservoirs and immunologic parameters in infected individuals
Source: PubMed Central journal article supplement (PMC5764487; doi:10.1371/journal.ppat.1006792), 2018-01-11
Supplement: ppat.1006792.s005.pdf [file ppat.1006792.s005.pdf]

S1 Table.

| Sequence ID | Study Participant | Time point | Subtype | Potential Drug Escape Mutations |                   |       |      |
|-------------|-------------------|------------|---------|---------------------------------|-------------------|-------|------|
|             |                   |            |         | PI                              | NRTI              | NNRTI | INI  |
| K0004       | N01               | Pre-ATI    | B       | None                            | None              | None  | None |
| K0006       | N01               | Pre-ATI    | B       | None                            | None              | None  | None |
| K0068       | N01               | Pre-ATI    | B       | None                            | None              | None  | None |
| K0072       | N01               | Pre-ATI    | B       | None                            | None              | None  | None |
| K0080       | N01               | Pre-ATI    | B       | None                            | None              | None  | None |
| K0088       | N01               | Pre-ATI    | B       | None                            | None              | None  | None |
| K0092       | N01               | Post-ATI   | B       | None                            | None              | None  | None |
| K0109       | N01               | Post-ATI   | B       | None                            | <b>K70R,M184V</b> | None  | None |
| K0128       | N02               | Pre-ATI    | B       | None                            | None              | None  | None |
| K0132       | N02               | Pre-ATI    | B       | None                            | None              | None  | None |
| K0180       | N02               | Post-ATI   | B       | None                            | None              | None  | None |
| K0181       | N02               | Post-ATI   | B       | None                            | None              | None  | None |
| K0017       | N02               | Post-ATI   | B       | None                            | None              | None  | None |
| K0189       | N02               | Post-ATI   | B       | None                            | None              | None  | None |
| K0020       | N04               | Pre-ATI    | B       | None                            | None              | None  | None |
| K0022       | N04               | Pre-ATI    | B       | None                            | None              | None  | None |
| K0024       | N04               | Pre-ATI    | B       | None                            | None              | None  | None |
| K0027       | N04               | Pre-ATI    | B       | None                            | None              | None  | None |
| K0028       | N04               | Pre-ATI    | B       | None                            | None              | None  | None |
| K0135       | N04               | Pre-ATI    | B       | None                            | None              | None  | None |
| K0141       | N04               | Pre-ATI    | B       | None                            | None              | None  | None |
| K0145       | N04               | Pre-ATI    | B       | None                            | None              | None  | None |
| K0146       | N04               | Pre-ATI    | B       | None                            | None              | None  | None |
| K0148       | N04               | Pre-ATI    | B       | None                            | None              | None  | None |
| K0150       | N04               | Pre-ATI    | B       | None                            | None              | None  | None |
| K0154       | N04               | Pre-ATI    | B       | None                            | None              | None  | None |
| K0163       | N04               | Pre-ATI    | B       | None                            | None              | None  | None |
| K0166       | N04               | Pre-ATI    | B       | None                            | <b>K65R</b>       | None  | None |
| K0167       | N04               | Pre-ATI    | B       | None                            | None              | None  | None |
| K0168       | N04               | Pre-ATI    | B       | None                            | None              | None  | None |
| K0169       | N04               | Pre-ATI    | B       | None                            | None              | None  | None |
| K0171       | N04               | Pre-ATI    | B       | None                            | None              | None  | None |
| K0172       | N04               | Pre-ATI    | B       | None                            | None              | None  | None |
| K0030       | N04               | Post-ATI   | B       | None                            | None              | None  | None |
| K0033       | N04               | Post-ATI   | B       | None                            | None              | None  | None |
| K0196       | N04               | Post-ATI   | B       | <b>M46I</b>                     | None              | None  | None |
| K0201       | N04               | Post-ATI   | B       | None                            | None              | None  | None |
| K0203       | N04               | Post-ATI   | B       | None                            | None              | None  | None |
| K0207       | N04               | Post-ATI   | B       | None                            | None              | None  | None |
| K0209       | N04               | Post-ATI   | B       | None                            | None              | None  | None |
| K0211       | N04               | Post-ATI   | B       | None                            | None              | None  | None |
| K0269       | N06               | Post-ATI   | B       | None                            | None              | None  | None |
| K0271       | N06               | Post-ATI   | B       | None                            | None              | None  | None |
| K0386       | N08               | Pre-ATI    | B       | None                            | None              | None  | None |
| K0289       | N08               | Pre-ATI    | B       | None                            | None              | None  | None |
| K0291       | N08               | Pre-ATI    | B       | None                            | None              | None  | None |
| K0296       | N08               | Pre-ATI    | B       | None                            | None              | None  | None |
| K0306       | N08               | Pre-ATI    | B       | None                            | None              | None  | None |
| K0311       | N08               | Pre-ATI    | B       | None                            | None              | None  | None |
| K0324       | N08               | Post-ATI   | B       | None                            | None              | None  | None |
| K0326       | N08               | Post-ATI   | B       | None                            | None              | None  | None |
| K0330       | N08               | Post-ATI   | B       | None                            | None              | None  | None |
| K0331       | N08               | Post-ATI   | B       | None                            | None              | None  | None |
| K0338       | N08               | Post-ATI   | B       | None                            | None              | None  | None |
| K0340       | N08               | Post-ATI   | B       | None                            | None              | None  | None |
| K0346       | N08               | Post-ATI   | B       | None                            | None              | None  | None |
| K0347       | N08               | Post-ATI   | B       | None                            | None              | None  | None |
| K0349       | N08               | Post-ATI   | B       | None                            | None              | None  | None |
| K0352       | N08               | Post-ATI   | B       | None                            | None              | None  | None |
| K0354       | N08               | Post-ATI   | B       | None                            | None              | None  | None |
| K0360       | N08               | Post-ATI   | B       | None                            | None              | None  | None |
| K0366       | N08               | Post-ATI   | B       | None                            | None              | None  | None |
| K0367       | N08               | Post-ATI   | B       | None                            | None              | None  | None |
| K0370       | N08               | Post-ATI   | B       | None                            | None              | None  | None |
| K0378       | N08               | Post-ATI   | B       | None                            | None              | None  | None |
| K0380       | N08               | Post-ATI   | B       | None                            | None              | None  | None |
| K0381       | N08               | Post-ATI   | B       | None                            | None              | None  | None |
| K0382       | N08               | Post-ATI   | B       | None                            | None              | None  | None |
| K0383       | N08               | Post-ATI   | B       | None                            | None              | None  | None |
| K0385       | N08               | Post-ATI   | B       | None                            | None              | None  | None |
| K0046       | N09               | Pre-ATI    | B       | None                            | None              | None  | None |
| K0052       | N09               | Pre-ATI    | B       | None                            | None              | None  | None |
| K0402       | N09               | Pre-ATI    | B       | None                            | None              | None  | None |
| K0404       | N09               | Pre-ATI    | B       | None                            | None              | None  | None |
| K0408       | N09               | Pre-ATI    | B       | None                            | None              | None  | None |
| K0409       | N09               | Pre-ATI    | B       | None                            | None              | None  | None |
| K0411       | N09               | Pre-ATI    | B       | None                            | None              | None  | None |
| K0412       | N09               | Pre-ATI    | B       | None                            | None              | None  | None |
| K0413       | N09               | Pre-ATI    | B       | None                            | None              | None  | None |
| K0414       | N09               | Pre-ATI    | B       | None                            | None              | None  | None |
| K0415       | N09               | Pre-ATI    | B       | None                            | None              | None  | None |
| K0417       | N09               | Pre-ATI    | B       | None                            | None              | None  | None |
| K0418       | N09               | Pre-ATI    | B       | None                            | None              | None  | None |
| K0419       | N09               | Pre-ATI    | B       | None                            | None              | None  | None |
| K0420       | N09               | Pre-ATI    | B       | None                            | None              | None  | None |
| K0421       | N09               | Pre-ATI    | B       | None                            | None              | None  | None |
| K0430       | N09               | Pre-ATI    | B       | None                            | None              | None  | None |
| K0433       | N09               | Pre-ATI    | B       | None                            | None              | None  | None |
| K0437       | N09               | Pre-ATI    | B       | None                            | None              | None  | None |
| K0446       | N09               | Pre-ATI    | B       | None                            | None              | None  | None |
| K0449       | N09               | Pre-ATI    | B       | None                            | None              | None  | None |
| K0454       | N09               | Pre-ATI    | B       | None                            | None              | None  | None |
| K0455       | N09               | Pre-ATI    | B       | None                            | None              | None  | None |
| K0470       | N09               | Post-ATI   | B       | None                            | None              | None  | None |
| K0474       | N09               | Post-ATI   | B       | None                            | None              | None  | None |
| K0496       | N09               | Post-ATI   | B       | None                            | None              | None  | None |
| K0059       | N10               | Post-ATI   | B       | None                            | None              | None  | None |
| K0060       | N10               | Post-ATI   | B       | None                            | None              | None  | None |
| K0062       | N10               | Post-ATI   | B       | None                            | None              | None  | None |
| K0514       | N10               | Post-ATI   | B       | None                            | None              | None  | None |
| K0521       | N10               | Post-ATI   | B       | None                            | None              | None  | None |
| K0522       | N10               | Post-ATI   | B       | None                            | None              | None  | None |
| K0525       | N10               | Post-ATI   | B       | None                            | None              | None  | None |
| K0527       | N10               | Post-ATI   | B       | None                            | None              | None  | None |
| K0528       | N10               | Post-ATI   | B       | None                            | None              | None  | None |
| K0530       | N10               | Post-ATI   | B       | None                            | None              | None  | None |
| K0535       | N10               | Post-ATI   | B       | None                            | None              | None  | None |
| K0536       | N10               | Post-ATI   | B       | None                            | None              | None  | None |
| K0537       | N10               | Post-ATI   | B       | None                            | None              | None  | None |

PI, protease inhibitor, NRTI, nucleoside reverse transcriptase inhibitor, NNRTI, non-nucleoside reverse transcriptase inhibitor, INI, integrase inhibitor.
