# Supplementary material for: Effect of analytical treatment interruption and reinitiation of antiretroviral therapy on HIV reservoirs and immunologic parameters in infected individuals
Source: PubMed Central journal article supplement (PMC5764487; doi:10.1371/journal.ppat.1006792), 2018-01-11
Supplement: ppat.1006792.s008.pdf [file ppat.1006792.s008.pdf]

**S4 Table.**

| <b>Cytokines/<br/>chemokines</b> | <b>P value</b> | <b>Inflammation markers</b> | <b>P value</b> |
|----------------------------------|----------------|-----------------------------|----------------|
| IL-1 $\beta$                     | 0.9219         | APRIL/TNFSF13               | 0.4922         |
| IL-1Ra                           | 0.6953         | BAFF/TNFSF13B               | 0.1934         |
| IL-4                             | 0.7695         | sCD30/TNFRSF8               | 0.1602         |
| IL-5                             | 0.4316         | sCD163                      | 0.084          |
| IL-6                             | 0.9219         | Chitinase 3-like 1          | 0.1309         |
| IL-7                             | 0.625          | gp130/sIL-6R $\beta$        | 0.4922         |
| IL-8                             | 0.7695         | IFN- $\alpha$ 2             | 0.6406         |
| IL-9                             | 0.9219         | IFN- $\beta$                | 0.1934         |
| IL-10                            | 0.4922         | IFN- $\gamma$               | >0.9999        |
| IL-12 (p70)                      | 0.7871         | sIL-6Ra                     | 0.1309         |
| IL-13                            | 0.5078         | IL-8                        | 0.625          |
| IL-17                            | 0.5566         | IL-11                       | 0.4922         |
| Eotaxin                          | 0.7695         | IL-12 (p40)                 | 0.7422         |
| FGF basic                        | 0.4922         | IL-12 (p70)                 | 0.8262         |
| G-CSF                            | 0.6953         | IL-19                       | >0.9999        |
| GM-CSF                           | >0.9999        | IL-28A/IFN- $\lambda$ 2     | 0.9219         |
| IFN-g                            | 0.9219         | IL-29/IFN- $\lambda$ 1      | 0.9219         |
| IP-10                            | 0.1055         | IL-35                       | 0.4922         |
| MCP-1                            | 0.8652         | MMP-1                       | 0.6953         |
| MIP-1 $\alpha$                   | 0.5566         | MMP-2                       | 0.375          |
| PDGF-bb                          | 0.2754         | MMP-3                       | 0.4922         |
| MIP-1 $\beta$                    | 0.1602         | Osteocalcin                 | 0.4922         |
| RANTES                           | 0.0195         | Osteopontin                 | 0.3223         |
| TNF- $\alpha$                    | 0.4922         | sTNF-R1                     | 0.6523         |
| VEGF                             | 0.7695         | sTNF-R2                     | 0.2754         |
|                                  |                | TSLP                        | 0.7695         |
|                                  |                | TWEAK/TNFSF12               | 0.6953         |
